# Supplementary material
Source: HighWire-hosted journal article supplement (http://www.jrheum.org/highwire/filestream/29712/field_highwire_adjunct_files/0/150245DataSupp.pdf)
Supplement: 150245DataSupp.pdf [file 150245DataSupp.pdf]

## **ONLINE SUPPLEMENTARY DATA**

### **MATERIALS AND METHODS**

#### **Synovial tissue biopsy sampling, immunohistochemical/immunofluorescence stainings and quantification**

At baseline, all study subjects underwent arthroscopic synovial tissue (ST) biopsy sampling as previously described (1-3). In early arthritis patients ST biopsy sampling was performed in an inflamed wrist, ankle, knee or other (metacarpophalangeal or metatarsalphalangeal) joints. Autoantibody-positive individuals underwent ST biopsy sampling from a knee joint (3). No major complications of the arthroscopy were reported. At least six specimens were collected for immunohistochemistry, as described before (4), to correct for sampling error. The ST biopsy samples were snap-frozen en bloc in Tissue-Tek OCT (Sakura Finetek Europe B.V., Alphen aan de Rijn, the Netherlands) immediately after collection. Cryostat sections were cut (5  $\mu$ m each) and mounted on Star Frost adhesive glass slides (Knittelglass, Braunschweig, Germany). Sealed slides were stored at -80 °C until further use.

ST sections were stained in two sessions for the early arthritis patients and in one session for the autoantibody-positive individuals. The sections were fixed with acetone, and endogenous peroxidase activity was blocked by immersion in 0.3% hydrogen peroxide and 0.1% sodium azide in phosphate-buffered saline (PBS) for 20 minutes. Slides were incubated overnight at 4°C with primary antibody diluted in 1% bovine serum albumin/PBS. The primary antibody used in this study was monoclonal mouse antibody specific for NIK (sc-8417, Santa Cruz Biotechnology, Santa Cruz, CA). Sections were washed with PBS and incubated with goat anti-mouse antibodies (p0447, DAKO, Glostrup, Denmark), followed by incubation with biotinylated tyramide and streptavidin-HRP. Biotinylated tyramide was used for amplification, as previously described (5), and development with the AEC peroxidase

substrate kit (SK-4200, Vector Laboratories, Burlingame, CA). In a subset of the early arthritis patients (n=52), depending on the availability of the tissue, ST sections were stained in one session using a monoclonal anti-von Willebrand factor (vWF; F8/86; DAKO) antibody for blood vessels (6). A three-step immunoperoxidase protocol was used to detect specific staining for vWF, as described previously (7). Slides were counterstained with Mayer's hematoxylin (Merck, Darmstadt, Germany) and mounted in Kaisers glycerol gelatin (Merck). As a negative control, isotype-matched immunoglobulins were applied to the sections instead of the primary antibody.

ST was only further used for analysis if the quality of the tissue sections were sufficient according to the strict quality control system based on the presence of an intimal lining layer. In the early arthritis cohort the expression of synovial NIK and vWF was quantified by digital image analysis within one week after staining, as previously described (8). For each slide 18 representative high power fields (2.2 mm<sup>2</sup>) were analyzed. To correct for between-session variation, the factor correction program was used (9). In the autoantibody-positive individuals the expression of synovial NIK was much lower and therefore analyzed by semi-quantitative analysis (SQA) by two independent observers (KIM and KvZ), as previously described (10). Minor differences in assessment between the two observers were resolved by mutual agreement. The expression of synovial NIK was scored as either positive or negative.

In a random subset of the early arthritis patients, sections were stained for CD68 to detect macrophages (n=51), CD3 to detect T cells (n=51), and CD22 to detect B cells (n=61), and analyzed by SQA, as described before (11).

In 10 randomly selected early arthritis patients from the previously mentioned subset we performed double-immunofluorescence stainings on NIK and vWF using the same mouse

monoclonal anti-NIK antibody (sc-8417, Santa Cruz Biotechnology) and a polyclonal rabbit anti-vWF antibody (0082, DAKO). After incubation with goat anti-mouse-HRP (p0447, DAKO), the slides were incubated with streptavidine-Alexa-594 (S-32356, Molecular Probes Europe, Leiden, the Netherlands) and Alexa-488-conjugated goat anti-rabbit (A-11008, Molecular Probes Europe). The slides were mounted with Vectashield containing DAPI (Brunschwig VC-H-1500, Amsterdam, the Netherlands). As a negative control, sections were incubated with isotype controls. The slides were analyzed using a Leica DMRA fluorescence microscope (Leica, Wetzlar, Germany) coupled to a CCD camera and Image-Pro Plus software (Dutch Vision Components, Breda, the Netherlands).

## Reference list

1. Gerlag DM, Tak PP. How to perform and analyse synovial biopsies. *BestPractResClinRheumatol*. 2009;23:221-32.
2. van de Sande MG, Gerlag DM, Lodde BM, van Baarsen LG, Alivernini S, Codullo V, et al. Evaluating antirheumatic treatments using synovial biopsy: a recommendation for standardisation to be used in clinical trials. *AnnRheumDis*. 2011;70:423-7.
3. Kraan MC, Reece RJ, Smeets TJ, Veale DJ, Emery P, Tak PP. Comparison of synovial tissues from the knee joints and the small joints of rheumatoid arthritis patients: Implications for pathogenesis and evaluation of treatment. *Arthritis Rheum*. 2002;46:2034-8.
4. Gerlag D, Tak PP. Synovial biopsy. *BestPractResClinRheumatol*. 2005;19:387-400.
5. Smeets TJ, Barg EC, Kraan MC, Smith MD, Breedveld FC, Tak PP. Analysis of the cell infiltrate and expression of proinflammatory cytokines and matrix metalloproteinases in arthroscopic synovial biopsies: comparison with synovial samples from patients with end stage, destructive rheumatoid arthritis. *AnnRheumDis*. 2003;62:635-8.
6. van de Sande MG, de Hair MJ, Schuller Y, van de Sande GP, Wijbrandts CA, Dinant HJ, et al. The features of the synovium in early rheumatoid arthritis according to the 2010 ACR/EULAR classification criteria. *PLoSOne*. 2012;7:e36668.
7. Tak PP, van der Lubbe PA, Cauli A, Daha MR, Smeets TJ, Kluin PM, et al. Reduction of synovial inflammation after anti-CD4 monoclonal antibody treatment in early rheumatoid arthritis. *Arthritis Rheum*. 1995;38:1457-65.
8. Kraan MC, Haringman JJ, Ahern MJ, Breedveld FC, Smith MD, Tak PP. Quantification of the cell infiltrate in synovial tissue by digital image analysis. *Rheumatology(Oxford)*. 2000;39:43-9.
9. Ruijter JM, Thygesen HH, Schoneveld OJ, Das AT, Berkhout B, Lamers WH. Factor correction as a tool to eliminate between-session variation in replicate experiments: application to molecular biology and retrovirology. *Retrovirology*. 2006 2006;3:2.
10. Tak PP, Thirkow EW, Daha MR, Kluin PM, Smeets TJ, Meinders AE, et al. Expression of adhesion molecules in early rheumatoid synovial tissue. *ClinImmunolImmunopathol*. 1995;77:236-42.
11. van de Sande MG, Thurlings RM, Boumans MJ, Wijbrandts CA, Modesti MG, Gerlag DM, et al. Presence of lymphocyte aggregates in the synovium of patients with early arthritis in relationship to diagnosis and outcome: is it a constant feature over time? *Annals of the rheumatic diseases*. 2011;70:700-3.

**SUPPLEMENTARY TABLE 1.** NIK expression, mean swelling and cellular inflammation scores in the different joints. Values are median (interquartile range).

| Joint         | NIK Expression     | Swelling Biopsied Joint | CD68 Lining         | CD68 Sublining        | CD3+ T Cells        | CD22+ B Cells       |
|---------------|--------------------|-------------------------|---------------------|-----------------------|---------------------|---------------------|
| Knee, n = 100 | 154.9 (24.6-444.9) | 2 (1-2)                 | 464.1 (174.5-652.2) | 1595.5 (526.7-1789.3) | 392.9 (188.9-989.8) | 305.5 (118.6-812.4) |
| Ankle, n = 33 | 4.7 (0.0-56.0)     | 1 (1-2)                 | 56.8 (12.2-226.7)   | 126.9 (38.0-396.4)    | 88.5 (33.7-273.2)   | 252.9 (25.6-607.9)  |
| Wrist, n = 19 | 0.0 (0.0-18.7)     | 1 (1-1)                 | 50.0 (13.7-132.2)   | 30.1 (8.7-135.0)      | 41.1 (6.7-109.4)    | 190.1 (87.0-301.8)  |
| Other, n = 2  | 32.4 (30.2-32.4)   | 3 (2-3)                 | 179.0 (108.4-179.0) | 432.9 (295.1-432.9)   | 165.8 (79.0-165.8)  | 374.8 (34.9-374.8)  |

**SUPPLEMENTARY TABLE 2.** Development of arthritis in autoantibody-positive individuals in relation to baseline synovial NIK expression. For the frequencies of NIK-negative individuals and NIK-positive individuals in the 2 outcome groups, Pearson chi-square test was used ( $p = 0.739$ ). Values are n (%).

| Characteristic           | Autoantibody-positive Individuals |                             |           |
|--------------------------|-----------------------------------|-----------------------------|-----------|
|                          | No Arthritis Developed, n = 41    | Arthritis Developed, n = 13 | Total     |
| NIK-negative individuals | 33 (80.5)                         | 11 (84.6)                   | 44 (81.5) |
| NIK-positive individuals | 8 (19.5)                          | 2 (15.4)                    | 10 (18.5) |
